# Supplementary material for: Identification and Functional Analysis of the Caffeic Acid O-Methyltransferase (COMT) Gene Family in Rice (Oryza sativa L.)
Source: MDPI journal article supplement (doi:10.3390/ijms23158491), 2022-07-31
Supplement: s1 [file s1]

Motif1

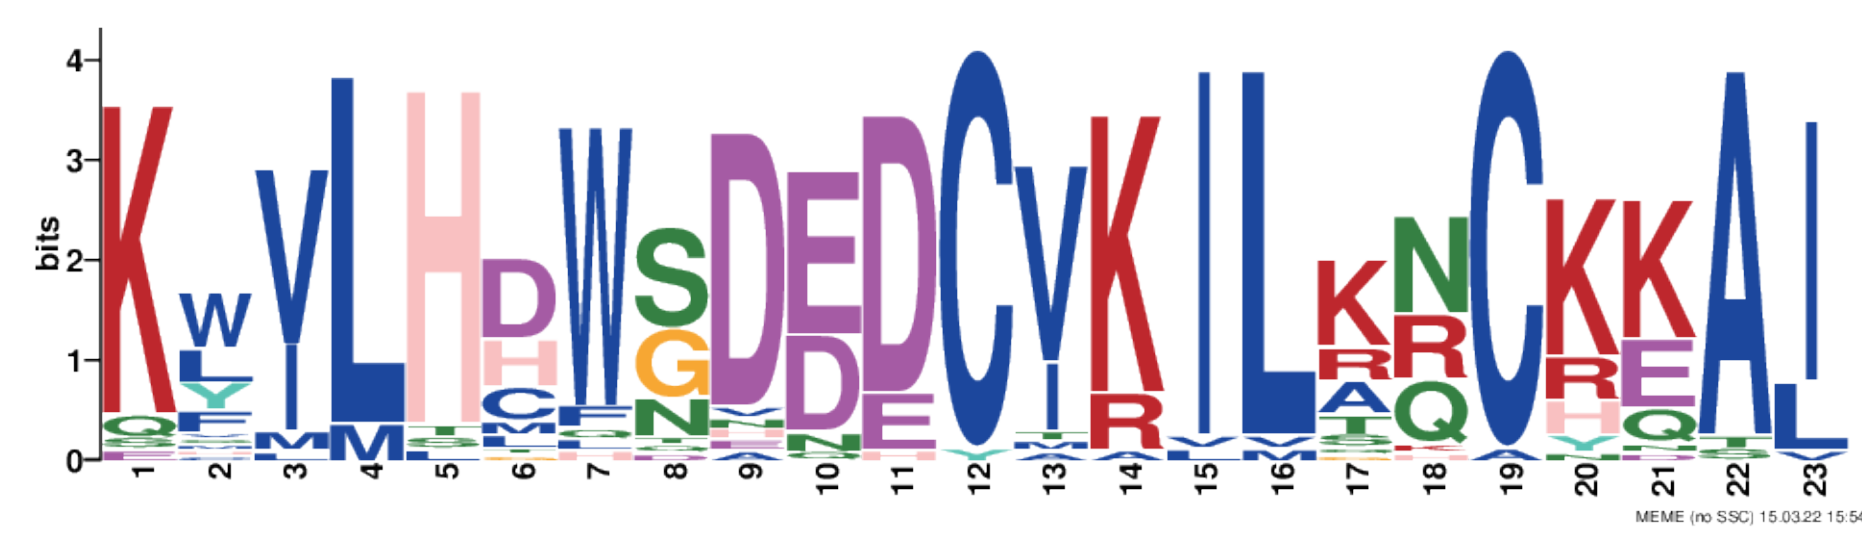

Motif2

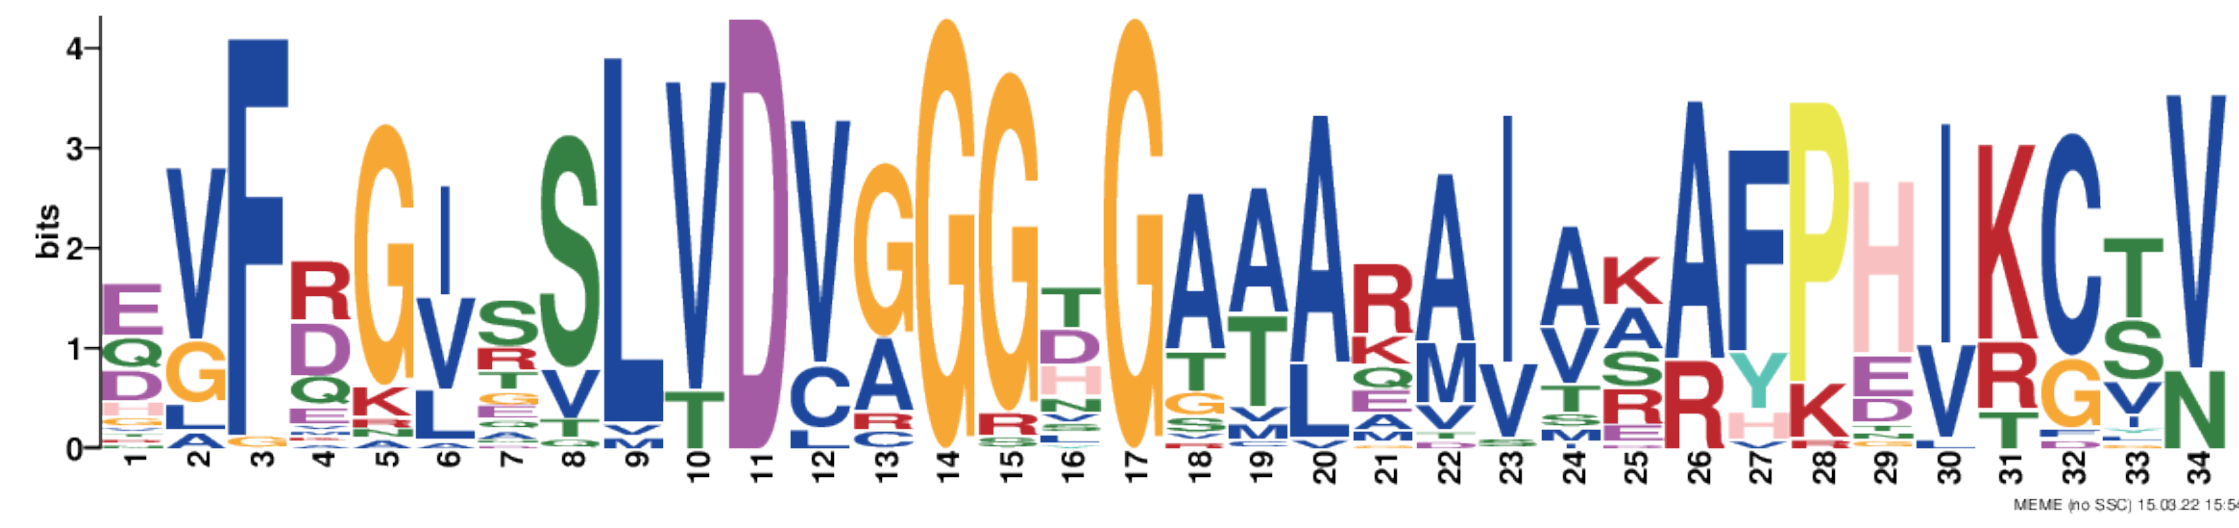

Motif3

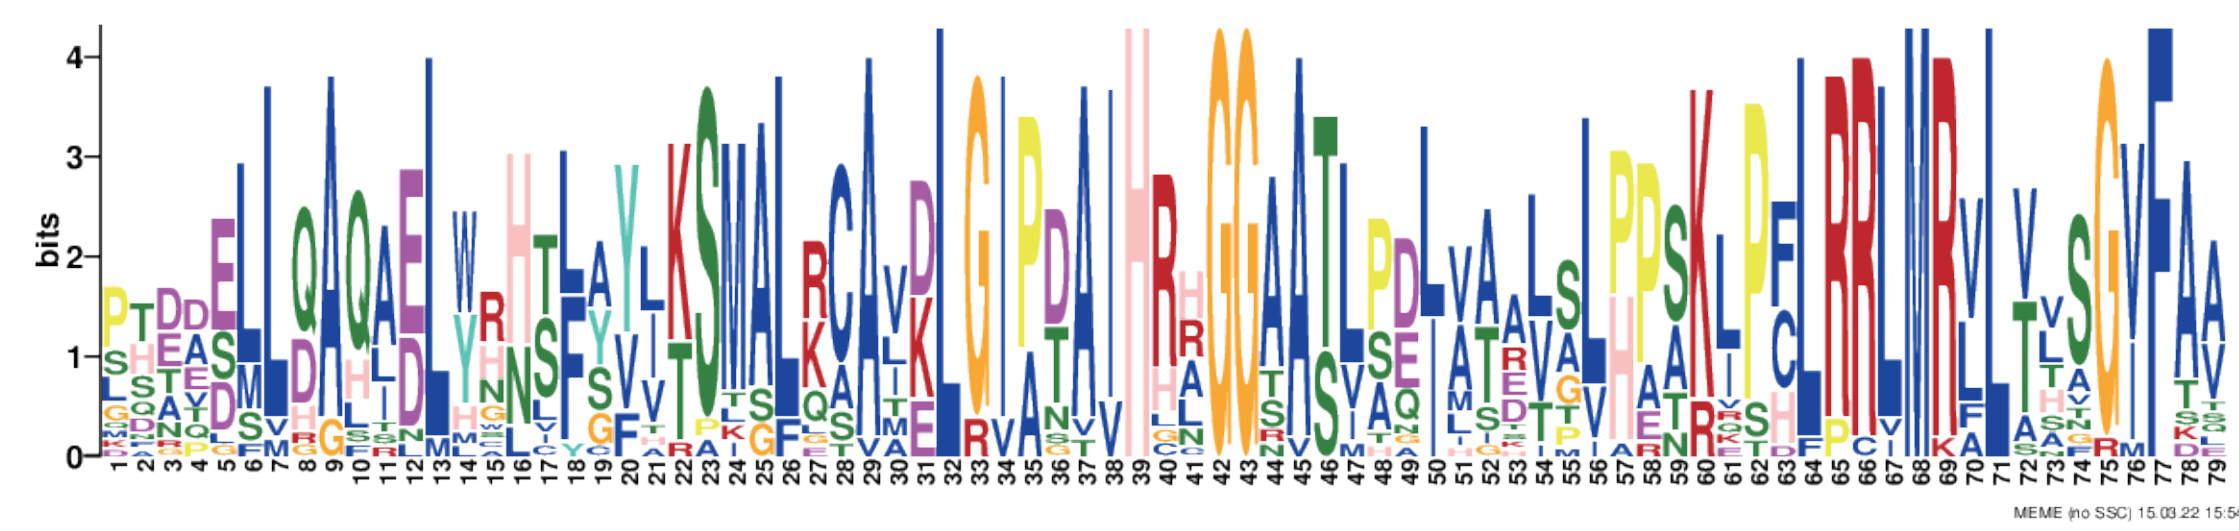

Motif4

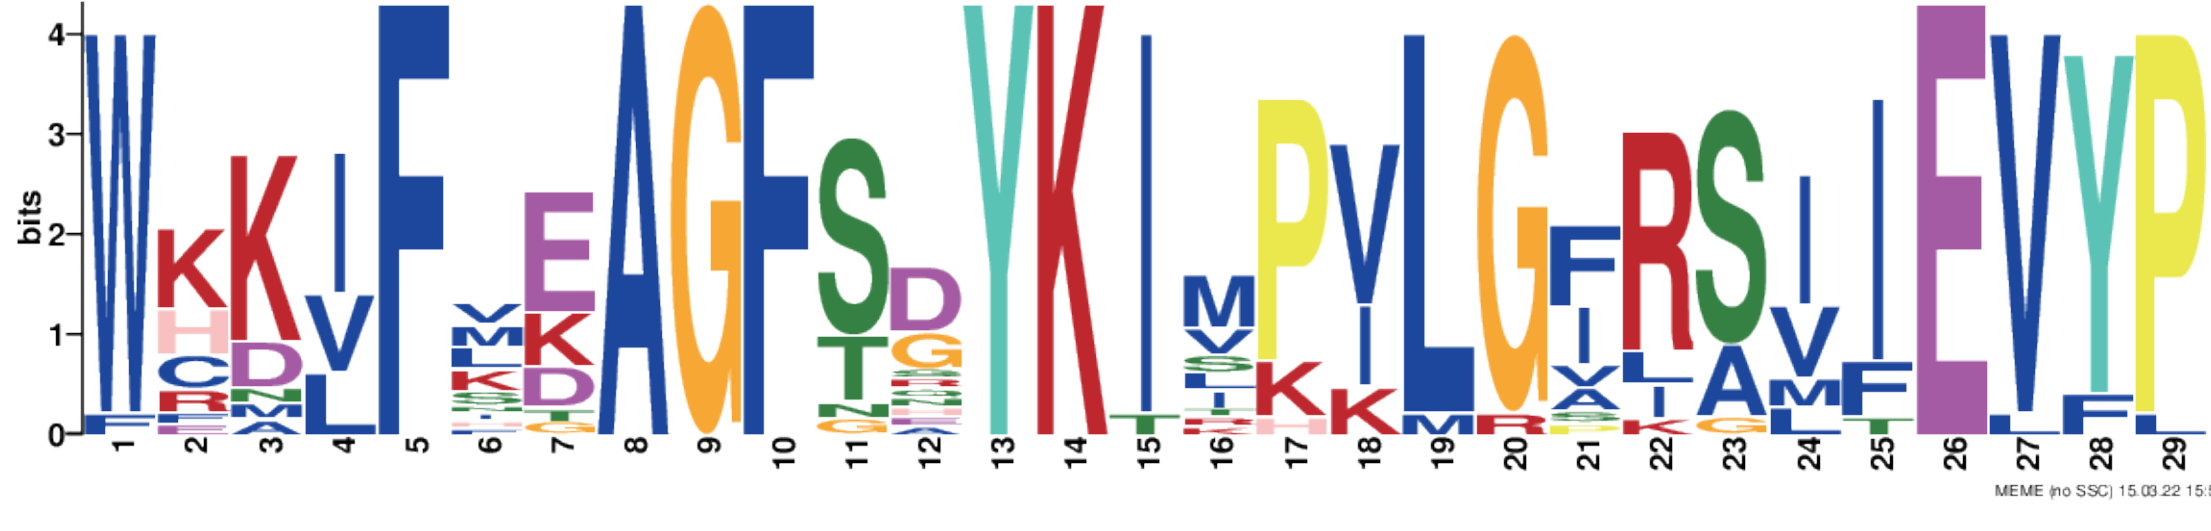

Motif5

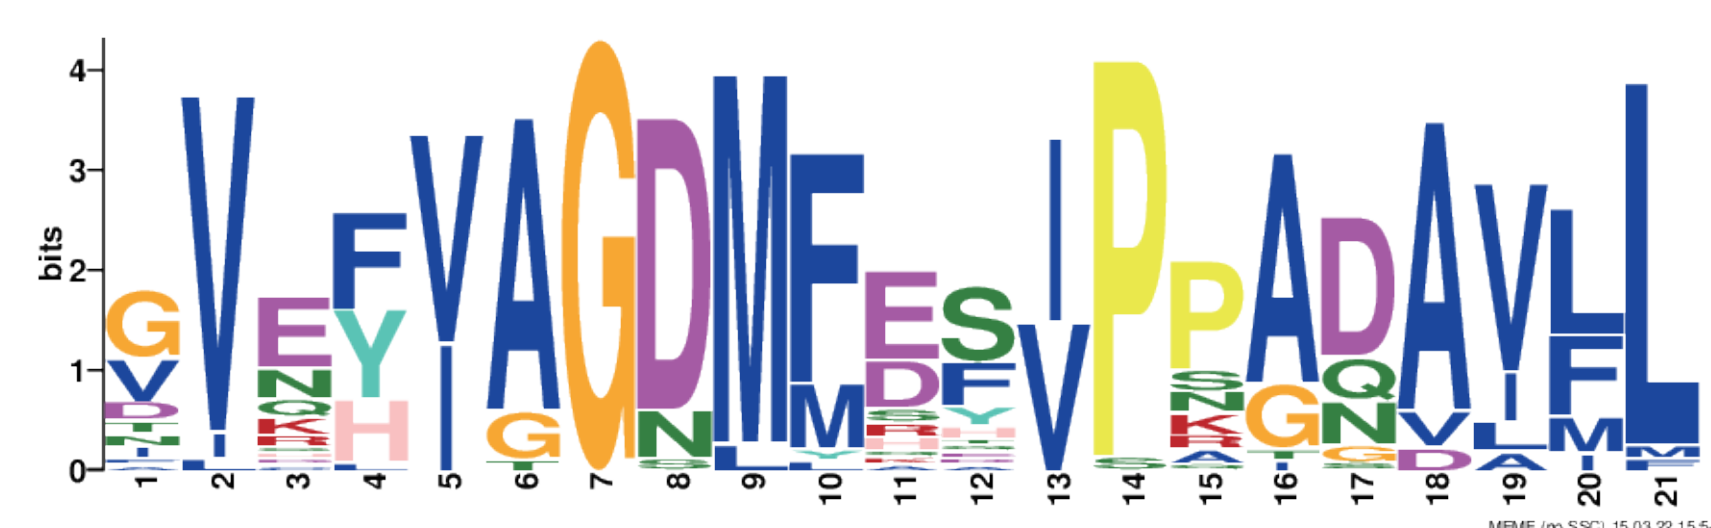

Motif6

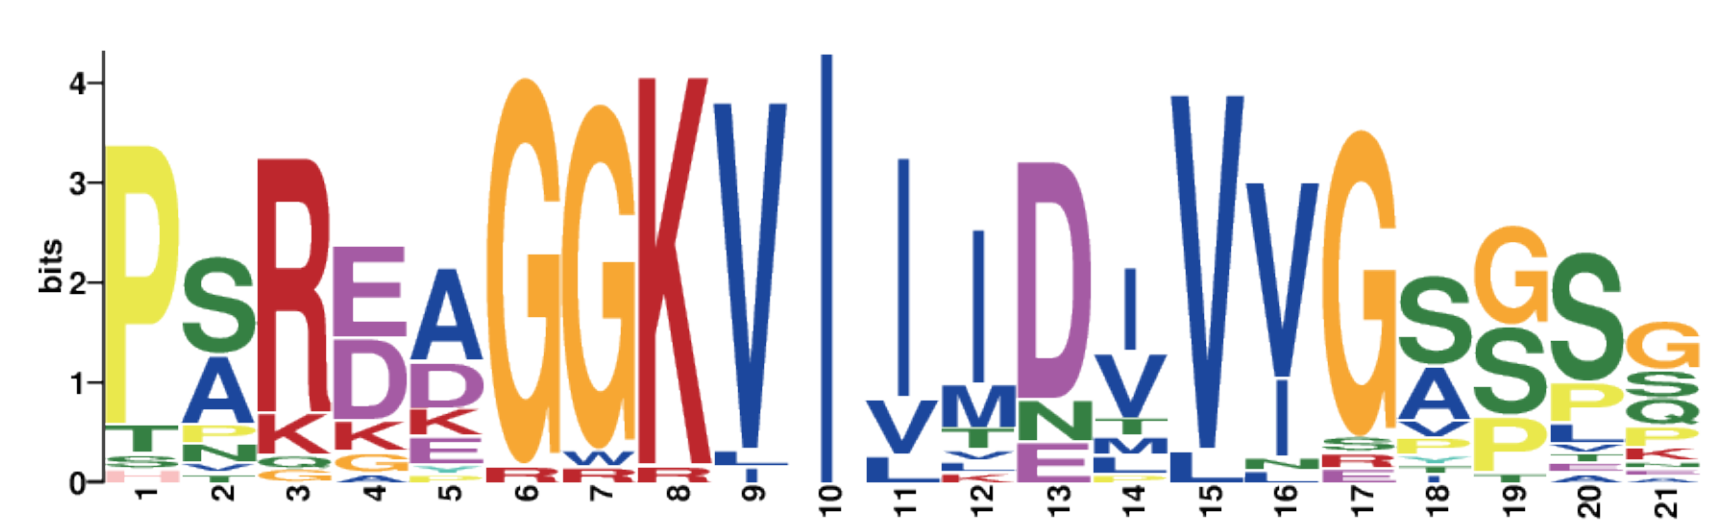

Motif7

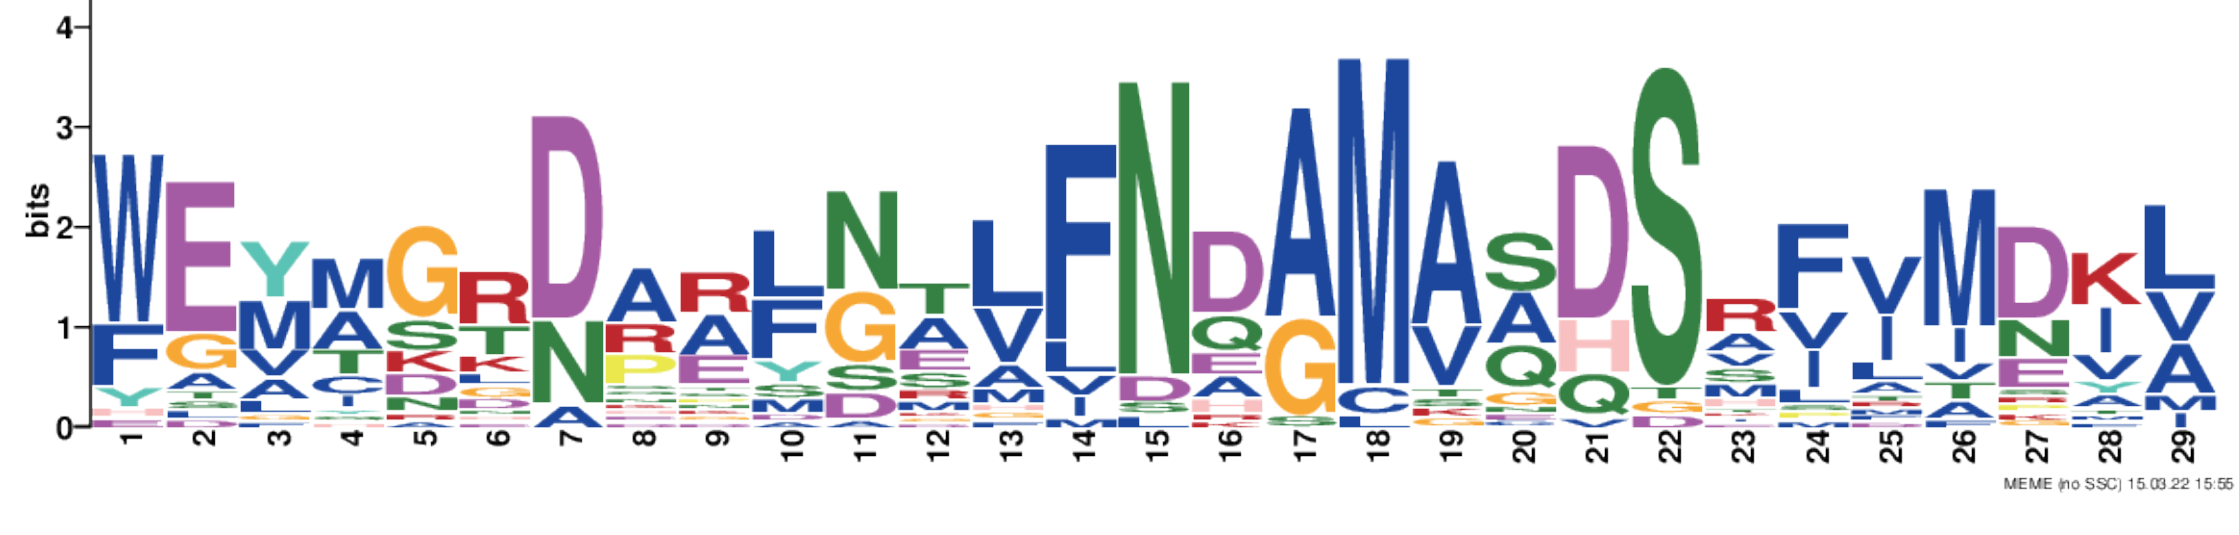

Motif8

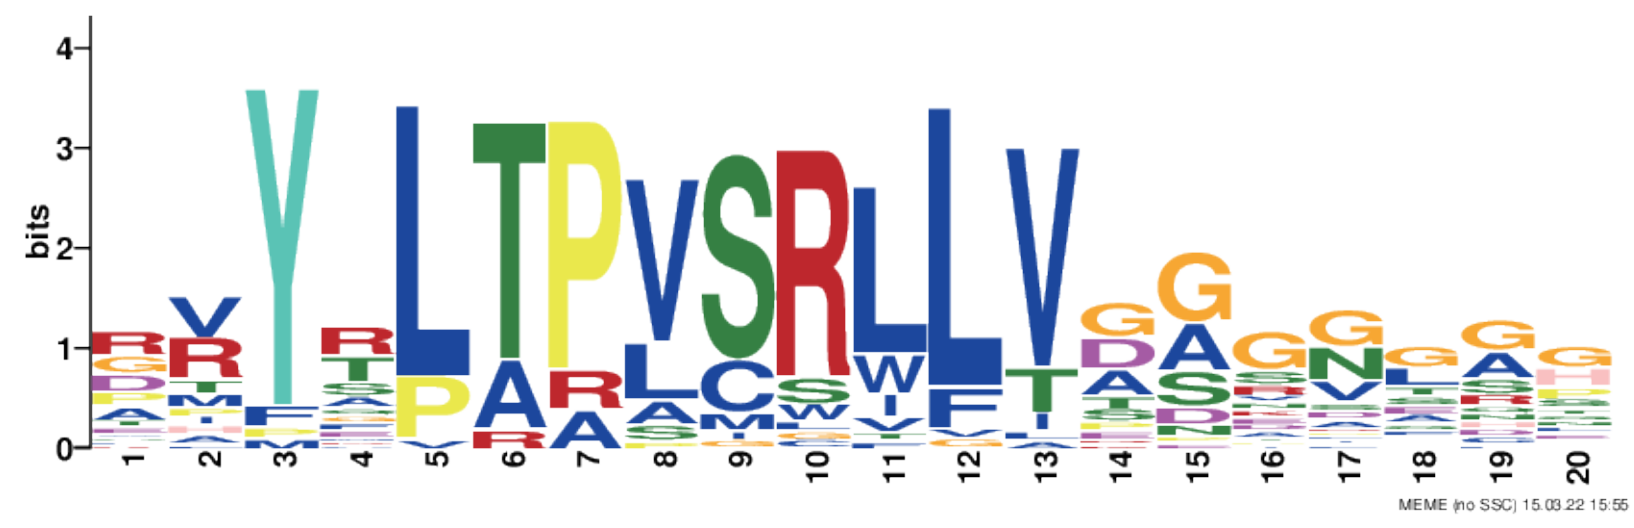

Motif9

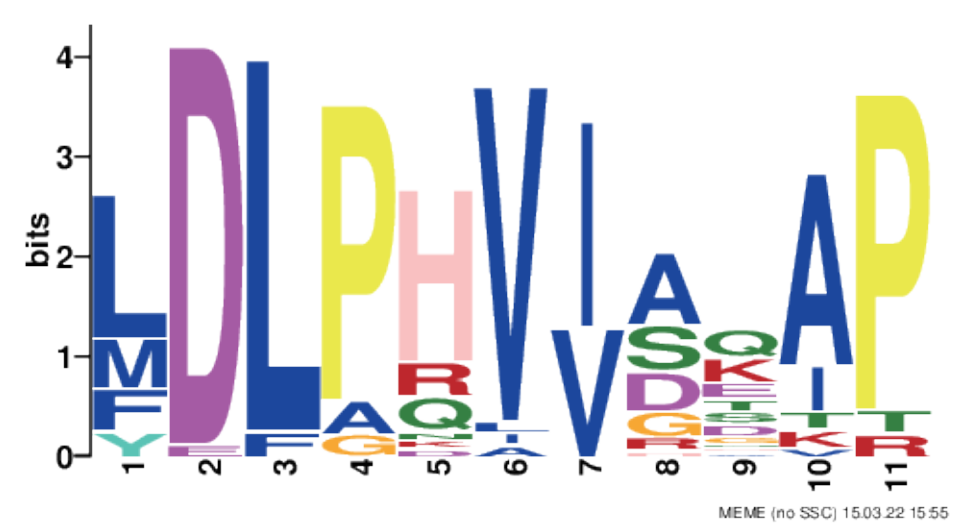

Motif10

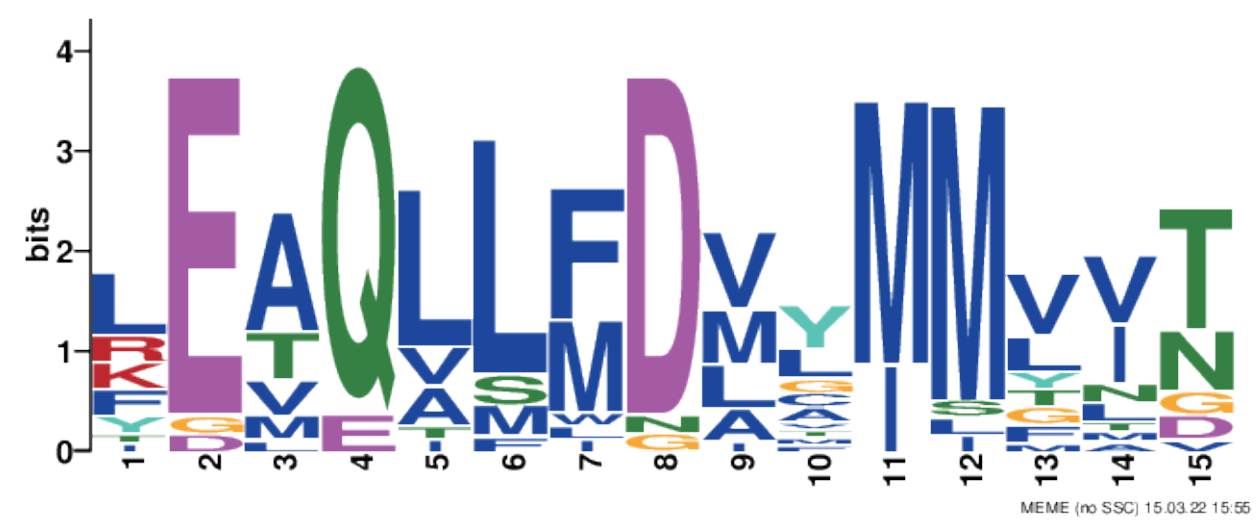

Motif11

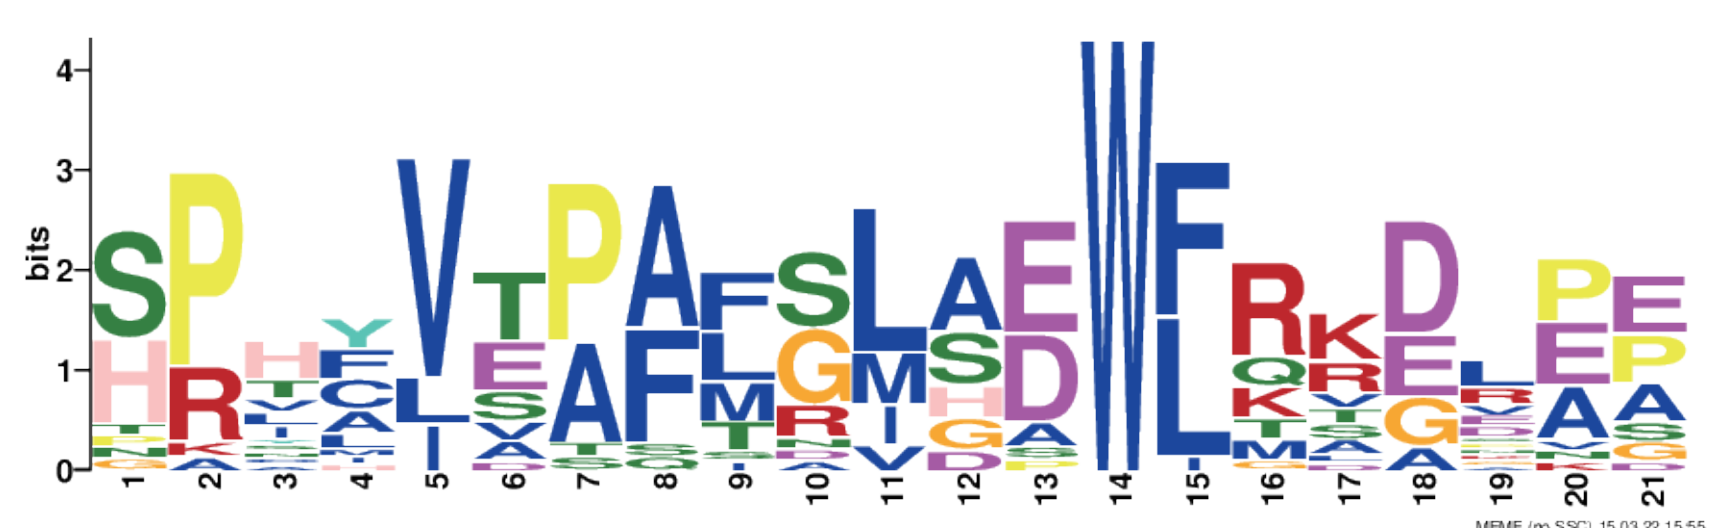

Motif12

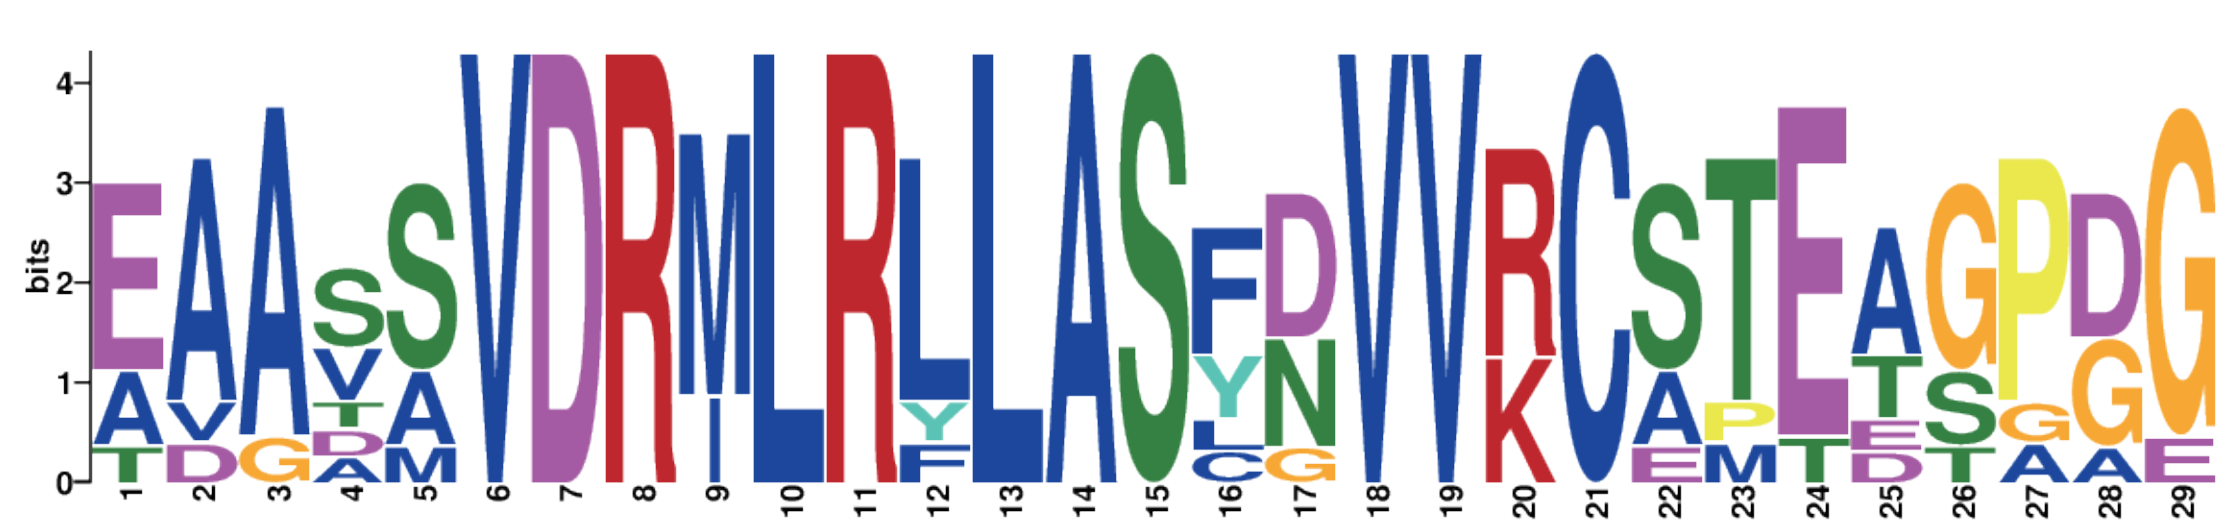

Figure S1. 12 motifs of *OsCOMTs*
