# Supplementary figures and images for: Identification and Functional Analysis of the Caffeic Acid O-Methyltransferase (COMT) Gene Family in Rice (Oryza sativa L.)
Source: MDPI journal article supplement (doi:10.3390/ijms23158491), 2022-07-31

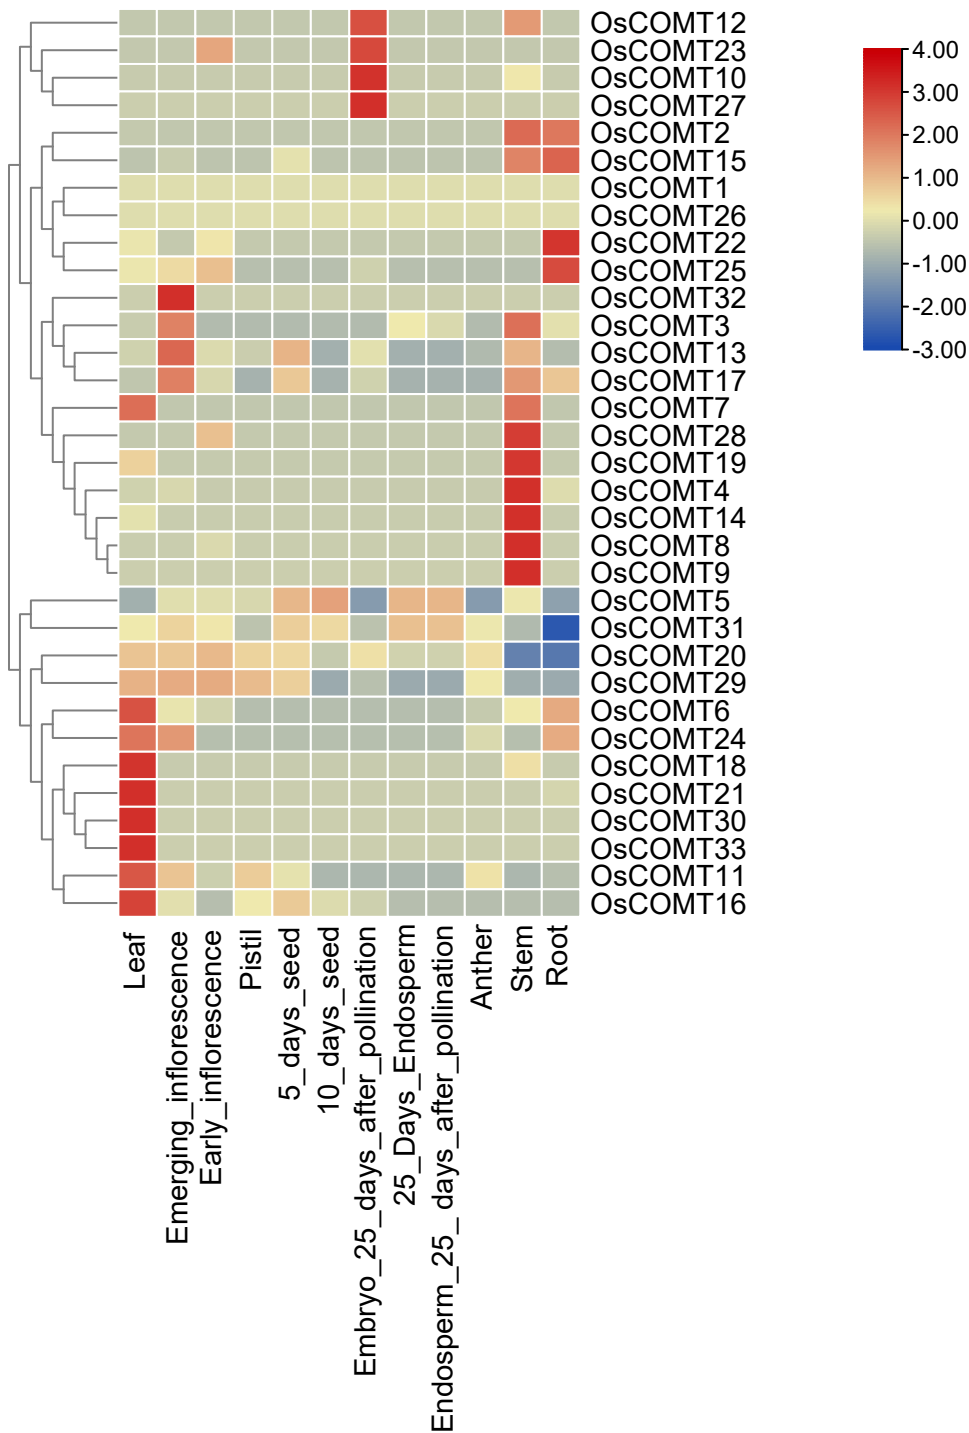

Figure S2. The expressiin pattern of *OsCOMTs* in differet tissue

Supplement: s1 [file s1]
